# Supplementary material
Source: PubMed Central journal article supplement (PMC3448000)

1,2,3-Triazole-Heme Interactions in Cytochrome P450: Functionally  
Competent Triazole-Water-Heme Complexes

**Supplemental Information**

*Kip P. Conner<sup>#</sup>, Preethi Vennam<sup>§</sup>, Caleb M. Woods<sup>#</sup>, Matthew D. Krzyaniak<sup>§</sup>, Michael K.  
Bowman<sup>§</sup>, William M. Atkins<sup>#\*</sup>*

<sup>#</sup>Department of Medicinal Chemistry, University of Washington, Box 357610, Seattle, WA  
98195-7610

<sup>§</sup>Department of Chemistry, University of Alabama, Tuscaloosa, AL 35487-0336

\*Corresponding Author: [winky@uw.edu](mailto:winky@uw.edu)

**Supplemental Figure S1.**  $IC_{50}$  measured for 17-click inhibition of CYP3A4-mediated  $6\beta$ -OH testosterone formation in Supersomes. See Materials and Methods in main text for assay design and conditions.

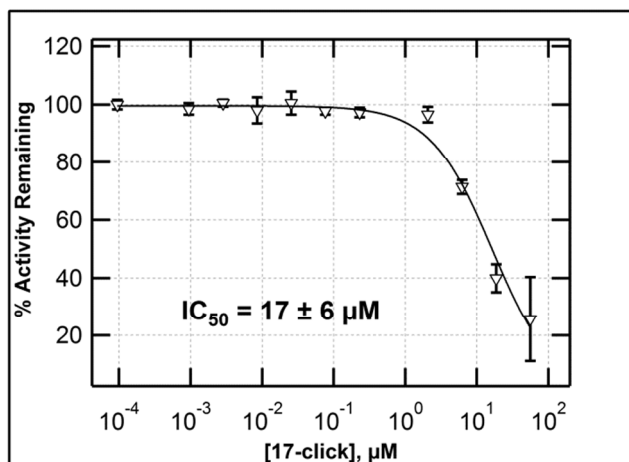

**Supplemental Figure S2.** kinetic parameters  $K_M$  and  $V_{\text{Max}}$  for CYP3A4-mediated turnover of 17-click in Supersomes determined by LC-MS/MS assay using the methods of substrate depletion. Assay concentration of CYP3A4 was 50 nM based on 0.5 nmol / 0.5 mL CYP concentration provided by the manufacturer. See Materials and Methods section of the main text for experimental design and conditions.

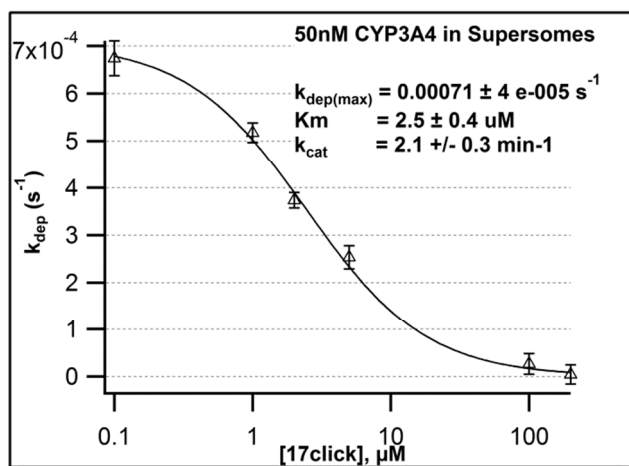

**Supplemental Figure S3.** Substrate depletion of 17EE and 17-click in the presence of 50 nM CYP3A4 in Supersomes. Depletion of the 17-click ( $m/z = 340$ ) and 17EE (dansylated derivative,  $m/z = 530$ ) were monitored by LC-MS/MS assay as described in the Materials and Methods section of the main text. While accurate determination of kinetic parameters  $K_m$  and  $V_{max}$  were only obtained for 17-click (Supplemental Figure S2), comparison of depletion data obtained at low and high concentrations of 17EE suggest metabolism is between 3-10 fold faster for the type I substrate 17EE.

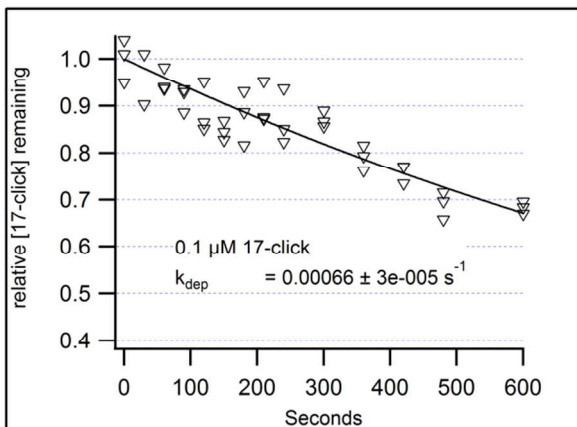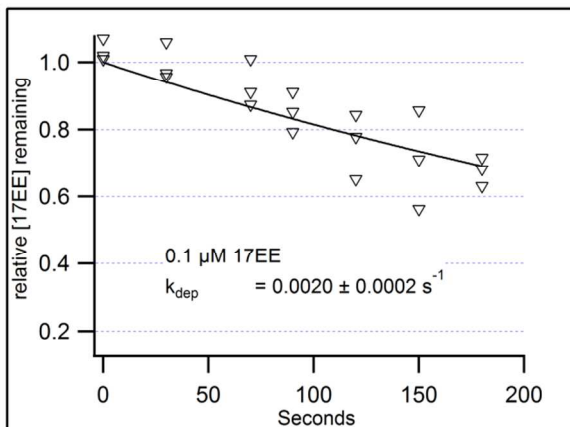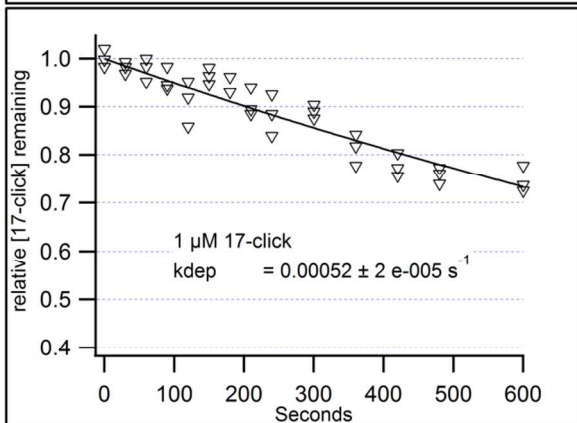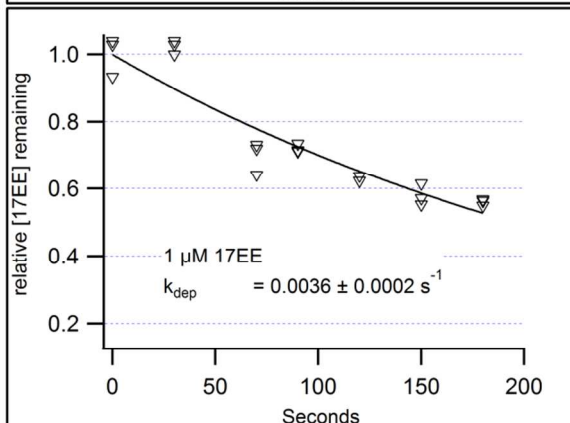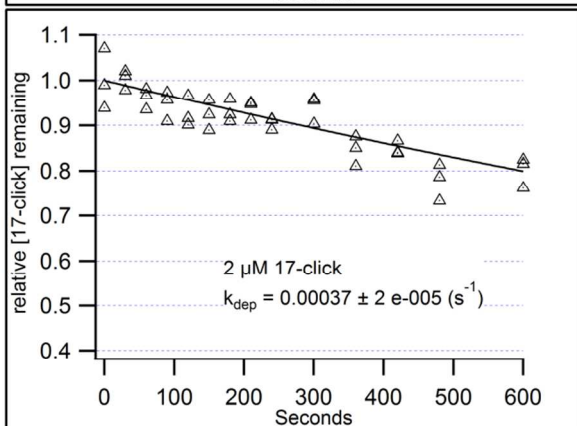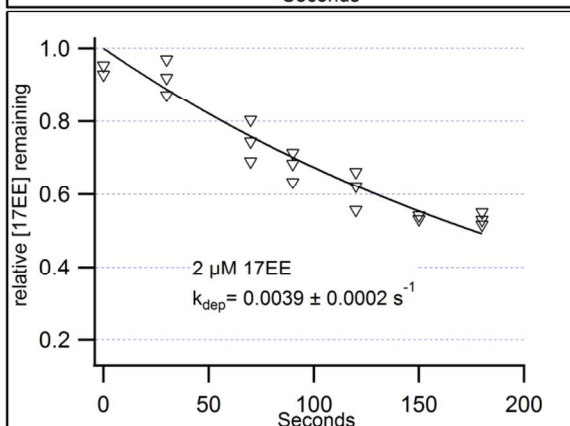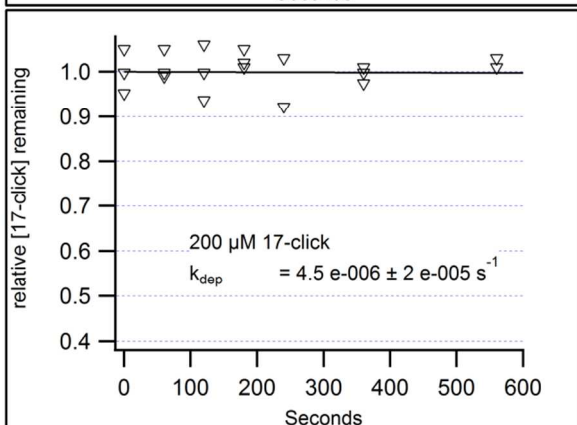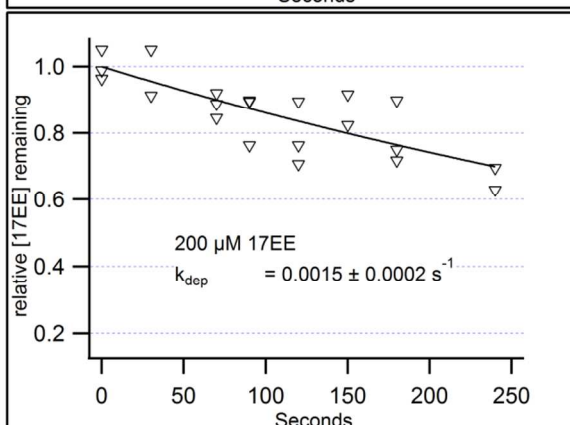

**Supplemental Figure S4.** qTOF MS/MS analysis of 17click metabolites M3 (Top), M2 (Middle), and M1 (Bottom). Similarity of fragment ion spectra to M4, (predominant fragment ions at  $m/z = 320$ ,  $m/z = 292$ , and  $m/z = 157$ ) suggests metabolism not occurring on steroid A-ring post 1,2,3-triazole fragment installation (see Results/Discussion).

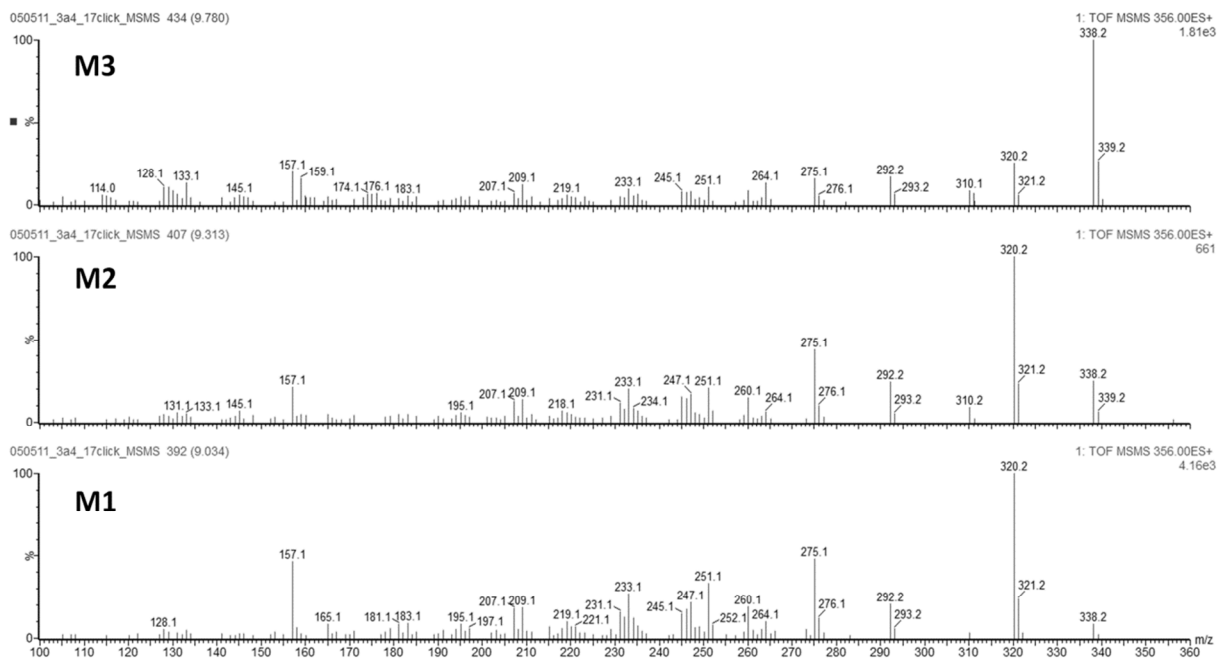

Supplement: NIHMS398139-supplement-1_si_001.pdf [file NIHMS398139-supplement-1_si_001.pdf]
